# Supplementary material for: Core-dependent properties of copper nanoclusters: valence-pure nanoclusters as NIR TADF emitters and mixed-valence ones as semiconductors
Source: Royal Society of Chemistry journal article supplement (doi:10.1039/c9sc03455b), 2019-01-01
Supplement: c9sc03455b1.pdf [file c9sc03455b1.pdf]

## Supporting Information for

### **Core-Dependent Properties of Copper Nanoclusters: Valence-Pure Nanoclusters as NIR TADF Emitters and Mixed-Valence Ones as Semiconductors**

|                                                      |                |
|------------------------------------------------------|----------------|
| <b>I. Experimental Section</b>                       | <b>S1–S3</b>   |
| <b>Chemicals and Reagents</b>                        |                |
| <b>Syntheses</b>                                     |                |
| <b>II. Spectrometric Characterizations</b>           | <b>S4–S8</b>   |
| <b>IR, PXRD, EDS, TGA, and EPR Spectra</b>           |                |
| <b>III. Dielectric and Conductivity Measurements</b> | <b>S9–S10</b>  |
| <b>IV. Crystal Structures</b>                        | <b>S11–S14</b> |
| <b>V. References</b>                                 | <b>S14</b>     |

## I. Experimental Section

**Chemicals and reagents:** All chemicals and reagents were commercially available and used as received. 3-Methyl-1-butyne ( $i\text{PrC}\equiv\text{CH}$ , 96%) was purchased from Alfa Aesar; 3,3-dimethyl-1-butyne ( $t\text{BuC}\equiv\text{CH}$ , 97%) was purchased from International Laboratory USA; *tert*-butylphosphonic acid ( $t\text{BuPO}_3\text{H}_2$ , 98%) was purchased from Acros Organics; sodium orthovanadate ( $\text{Na}_3\text{VO}_4$ , 98%) was purchased from Farco Chemical Supplies.

**Instrumentation:** Elemental analyses (C and H) were performed on a Perkin-Elmer 2400 elemental analyzer. IR spectra were recorded in the range 400–4000  $\text{cm}^{-1}$  on a Nicolet Impact 420 FTIR spectrometer with pressed KBr pellets. Powder X-ray diffraction (PXRD) were performed using a Rigaku SmartLab X-ray diffractometer ( $\text{CuK}\alpha$  radiation). Energy dispersive X-ray spectroscopy (EDS) analysis was performed on a JEOL JSM6700F field-emission scanning electron microscope equipped with an Oxford INCA system. Thermogravimetric analysis (TGA) was carried out on a Mettler Toledo TGA/SDTA 851e analyzer at a ramp rate of 10  $^\circ\text{C}/\text{min}$  from 50 to 800  $^\circ\text{C}$ . Electron paramagnetic resonance (EPR) data of **3** and **4** were recorded on a Bruker EMX-EPR Spectrometer at  $T = 7\text{ K}$  in the solid state. UV-Vis-NIR diffuse reflectance was recorded using finely ground powder samples with  $\text{BaSO}_4$  as standard on a SHIMADZU UV-3600 spectrophotometer. Temperature-dependent emission spectra and lifetimes were recorded using a FLS980 Edinburgh spectrometer equipped with an OptistatDN2 cryostat. The recording temperature range for **1** and **2** was 77–398 K and 77–328 K, respectively. The upper temperature limits are lower than the thermal stability temperature of **1** and **2** (423 K) since the emission intensity above such temperature became very weak. The excitation and emission spectra were processed with standard corrections to eliminate the influence of the excitation source and the sensitivity of the detector. Decay lifetimes were measured using a  $\mu\text{F900}$  pulsed Xenon microsecond flash lamp with instrumental response function (IRF) applied.

### Syntheses:

#### $[\text{Cu}(\text{I})_{15}(t\text{BuC}\equiv\text{C})_{14}\text{NO}_3]$ (**1**)

To a 250-ml round-bottom flask,  $\text{Cu}(\text{II})(\text{NO}_3)_2 \cdot 3\text{H}_2\text{O}$  (0.50 mmol, 0.121 g), copper powder  $\text{Cu}(0)$  (0.127 g, 2.00 mmol),  $t\text{BuC}\equiv\text{CH}$  (0.5 ml, 4.06 mmol) and methanol (10 mL) were added. This flask was capped with a stopper and sealed with parafilm. The reaction mixture was stirred overnight to give a red solution. This crude solution was filtered, and red crystals of **1** were obtained by storing the filtrate at  $-20^\circ\text{C}$  within

a few days. After removing the crystals by filtration, a second batch was collected to give a final yield of 80%. Yield: 0.114 g (80%, based on Cu(II)). Elemental analysis (%) for **1** as C<sub>84</sub>H<sub>126</sub>Cu<sub>15</sub>NO<sub>3</sub>, found (calcd): C, 46.94 (46.90); H, 5.88 (5.90). Infrared (KBr, cm<sup>-1</sup>): NO<sub>3</sub>: 1358 (m); 886 (w).

**[Cu(I)<sub>28</sub>(<sup>t</sup>BuC≡C)<sub>22</sub>(SO<sub>4</sub>)<sub>2</sub>(OCH<sub>3</sub>)<sub>2</sub>] (2)**

To a 250-ml round-bottom flask, Cu(II)SO<sub>4</sub> (0.080 g, 0.50 mmol), copper powder Cu(0) (0.127 g, 2.00 mmol), <sup>t</sup>BuC≡CH (0.5 ml, 4.06 mmol) and methanol (10 mL) were added. This flask was capped with a stopper and sealed with parafilm. The reaction mixture was stirred overnight at 60°C to give a yellow-orange precipitate. To dissolve the precipitate, an amount of *ca.* 50 ml methanol was added, and heated under stirring at 100°C for 2 hours to give a clear red solution. Upon filtration, the filtrate was transferred to a glass bottle and stored at -20°C to yield yellow crystals of **2** within two months. Before appearance of crystals, we would rotate the bottle gently and then put it back to the refrigerator. And once we saw crystals, we would repeat such manipulation to increase the crystal yield. Yield: 0.02 g (14.6%, based on Cu(II)). Elemental analysis (%) for **2** as C<sub>134</sub>H<sub>204</sub>Cu<sub>28</sub>O<sub>10</sub>S<sub>2</sub>, found (calcd): C, 41.95 (42.15); H, 5.38 (5.38). Infrared (KBr, cm<sup>-1</sup>): SO<sub>4</sub><sup>2-</sup>: 1122 (m); 622 (w).

**{[Cu(II)O<sub>6</sub>]@Cu(I)<sub>47</sub>(<sup>i</sup>PrC≡C)<sub>33</sub>}·(ClO<sub>4</sub>)<sub>4</sub> (3)**

To a 250-ml round-bottom flask, <sup>t</sup>BuPO<sub>3</sub>H<sub>2</sub> (0.020 g, 0.145 mmol), Na<sub>3</sub>VO<sub>4</sub> (0.020 g, 0.11 mmol) and a small amount of 0.3 ml H<sub>2</sub>O was added, followed by addition of Cu(II)(ClO<sub>4</sub>)<sub>2</sub>·6H<sub>2</sub>O (0.30 mmol, 0.111 g), copper powder Cu(0) (0.127 g, 2.00 mmol), <sup>i</sup>PrC≡CH (0.5 ml, 4.89 mmol), and methanol (10 mL). This flask was capped with a stopper and sealed with parafilm. The reaction mixture was vigorously stirred overnight at room temperature to give a yellow precipitate. The precipitate was subsequently collected by filtration, and re-dissolved in CH<sub>2</sub>Cl<sub>2</sub> under stirring. Slow diffusion of Et<sub>2</sub>O into the CH<sub>2</sub>Cl<sub>2</sub> filtrate yielded deep red crystals of **3** after two weeks. Yield: 0.015 g (21%, based on Cu(II)). Elemental analysis (%) for **3** as C<sub>165</sub>H<sub>231</sub>Cl<sub>4</sub>Cu<sub>48</sub>O<sub>22</sub> (after removal of solvent molecules under vacuum), found (calcd): C, 34.36 (34.41); H, 4.02 (4.04).

**{[Cu(II)O<sub>4</sub>]·[VO<sub>4</sub>]<sub>2</sub>@Cu(I)<sub>46</sub>(<sup>t</sup>BuC≡C)<sub>27</sub>(<sup>t</sup>BuPO<sub>3</sub>)<sub>2</sub>(H<sub>2</sub>O)}·(BF<sub>4</sub>)<sub>3</sub>·(CH<sub>2</sub>Cl<sub>2</sub>)<sub>2</sub>·(Et<sub>2</sub>O)<sub>2</sub>·(H<sub>2</sub>O) (4)**

To a 250-ml round-bottom flask, <sup>t</sup>BuPO<sub>3</sub>H<sub>2</sub> (0.020 g, 0.145 mmol), Na<sub>3</sub>VO<sub>4</sub> (0.020 g, 0.11 mmol) and a small amount of 0.3 ml H<sub>2</sub>O was added, followed by addition of Cu(II)(BF<sub>4</sub>)<sub>2</sub>·xH<sub>2</sub>O (*ca.* 0.50 mmol, 0.118 g), copper powder Cu(0) (0.127 g, 2.00 mmol), <sup>t</sup>BuC≡CH (0.5 ml, 4.06 mmol), and methanol (10 mL). The reaction mixture was vigorously stirred overnight at room temperature (alternatively, upon gentle stirring at 60°C) to yield a red precipitate. This red precipitate was collected by filtration and re-

dissolved in  $\text{CH}_2\text{Cl}_2$  under stirring. Slow diffusion of  $\text{Et}_2\text{O}$  into the  $\text{CH}_2\text{Cl}_2$  filtrate yielded black-brown crystals of **4** after two weeks. Yield: 0.035 g (26%, based on  $\text{Cu(II)}$ ). Elemental analysis (%) calcd for **4** as  $\text{C}_{170}\text{H}_{263}\text{B}_3\text{F}_{12}\text{P}_2\text{V}_2\text{Cu}_{47}\text{O}_{19}$  (after removal of solvent molecules under vacuum), found (calcd): C, 34.07 (33.95); H, 4.34 (4.40).

#### Vanadate-induced formation of the incorporating $\text{Cu(II)}$ cation in **3** and **4**:

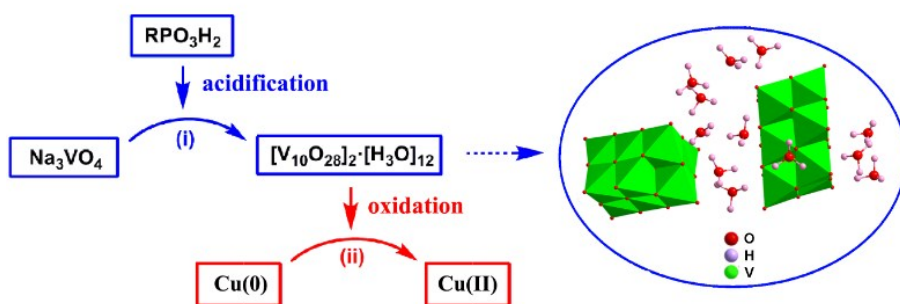

**Scheme S1.** Proposed mechanism for vanadate-induced formation of the incorporating  $\text{Cu(II)}$  cation in **3** and **4**. Step i)  $\text{Na}_3\text{VO}_4$  upon acidification by  $\text{tBuPO}_3\text{H}_2$  formed the intermediate  $[\text{V}_{10}\text{O}_{28}]_2 \cdot [\text{H}_3\text{O}]_{12}$ , with its X-ray structure shown inside an oval; Step ii)  $[\text{V}_{10}\text{O}_{28}]_2 \cdot [\text{H}_3\text{O}]_{12}$ -triggered oxidation of  $\text{Cu(0)}$  to in situ generate the  $\text{Cu(II)}$  cation.

Based on comproportionation reaction to form  $\text{Cu(I)}$  nanoclusters, the addendum unit of  $\text{Na}_3\text{VO}_4/\text{tBuPO}_3\text{H}_2$  was introduced to furnish the  $\text{Cu(II)}$ -incorporated  $\text{Cu(I)}$  nanoclusters **3** and **4**. By conducting control experiments, it is postulated that the  $\text{Cu(II)}$  cation was in situ generated stepwisely, as shown in Scheme S1. Firstly,  $\text{Na}_3\text{VO}_4$  upon acidification by  $\text{tBuPO}_3\text{H}_2$  to form a crucial intermediate  $[\text{V}_{10}\text{O}_{28}]_2 \cdot [\text{H}_3\text{O}]_{12}$  (Fig. S13), which is in accordance with the reaction  $20\text{Na}_3\text{VO}_4 + 30\text{tBuPO}_3\text{H}_2 = [\text{V}_{10}\text{O}_{28}]_2 \cdot [\text{H}_3\text{O}]_{12} + 30\text{Na}_2\text{tBuPO}_3 + 12\text{H}_2\text{O}$ . As observed,  $\text{Na}_3\text{VO}_4$  (white color) and  $\text{tBuPO}_3\text{H}_2$  (white color) upon mixing in the solid state immediately turned an orange solid. Dissolving of the orange solid by water and methanol (3: 1) gave an orange solution, which upon evaporation deposited orange crystals of  $[\text{V}_{10}\text{O}_{28}]_2 \cdot [\text{H}_3\text{O}]_{12}$  in good yield. This reaction is in accord to the common knowledge that the vanadate anion upon acidification transforms to polyoxovanadate species. Notably, this hydronium decavanadate compound  $[\text{V}_{10}\text{O}_{28}]_2 \cdot [\text{H}_3\text{O}]_{12}$  has not been reported prior to this work. Furthermore,  $\text{tBuPO}_3\text{H}_2$  can be replaced by  $\text{PrPO}_3\text{H}_2$  or  $\text{PhPO}_3\text{H}_2$ , suggesting that the general role of  $\text{RPO}_3\text{H}_2$  is providing protons to form  $[\text{V}_{10}\text{O}_{28}]_2 \cdot [\text{H}_3\text{O}]_{12}$ . Subsequently,  $\text{Cu(0)}$  upon oxidation by  $[\text{V}_{10}\text{O}_{28}]_2 \cdot [\text{H}_3\text{O}]_{12}$  in situ generated the  $\text{Cu(II)}$

cation. Herein, addition of Cu(0) to  $\text{Na}_3\text{VO}_4/\text{BuPO}_3\text{H}_2$  solution soon led to dissolution of the copper powder, accompanied by solution color change from range to deep blue. Evaporation of this solution afforded tiny blue crystals not suitable for X-ray diffraction analysis. Nevertheless, replacing  $\text{BuPO}_3\text{H}_2$  with  $\text{PrPO}_3\text{H}_2$  allowed us to grow good single crystals, which was crystallographically characterized as  $[\text{Cu}(\text{II})(\text{PrPO}_3)(\text{H}_2\text{O})]_n$  (Fig. S14).<sup>[1]</sup> This control experiment confirmed that  $\text{Na}_3\text{VO}_4/\text{BuPO}_3\text{H}_2$  triggered oxidation of Cu(0) to Cu(II). In addition, **3** can be accomplished by direct introduction of  $[\text{V}_{10}\text{O}_{28}]^{2-} \cdot [\text{H}_3\text{O}]_{12}$  into the comproportionation reaction, which further suggests the essential role of this intermediate in synthesis of **3** and **4**.

## II. Spectrometric Characterizations

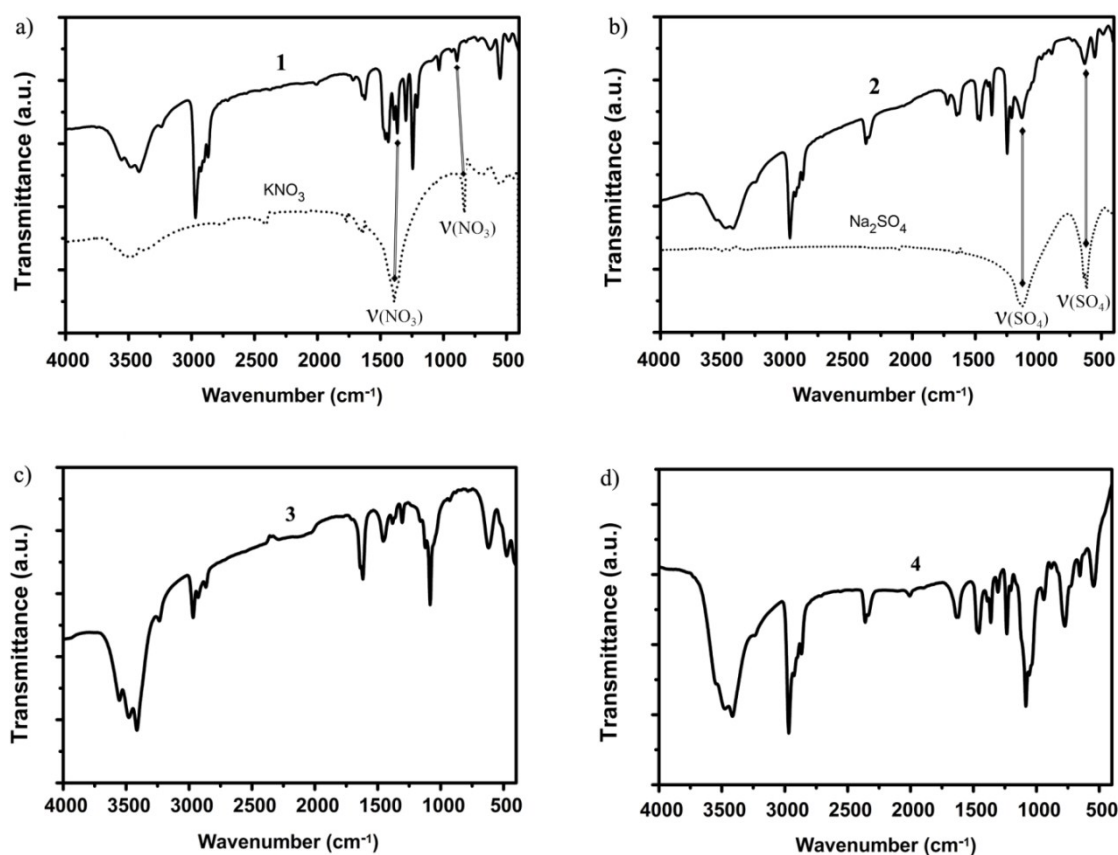

**Fig. S1** IR spectra of a) **1**, b) **2**, c) **3**, and d) **4**.  $\text{KNO}_3$  and  $\text{Na}_2\text{SO}_4$  (dashed line) were used as references to identify the vibration frequency of  $\text{NO}_3^-$  and  $\text{SO}_4^{2-}$  in **1** and **2**, respectively, which are marked by the double-head arrow.

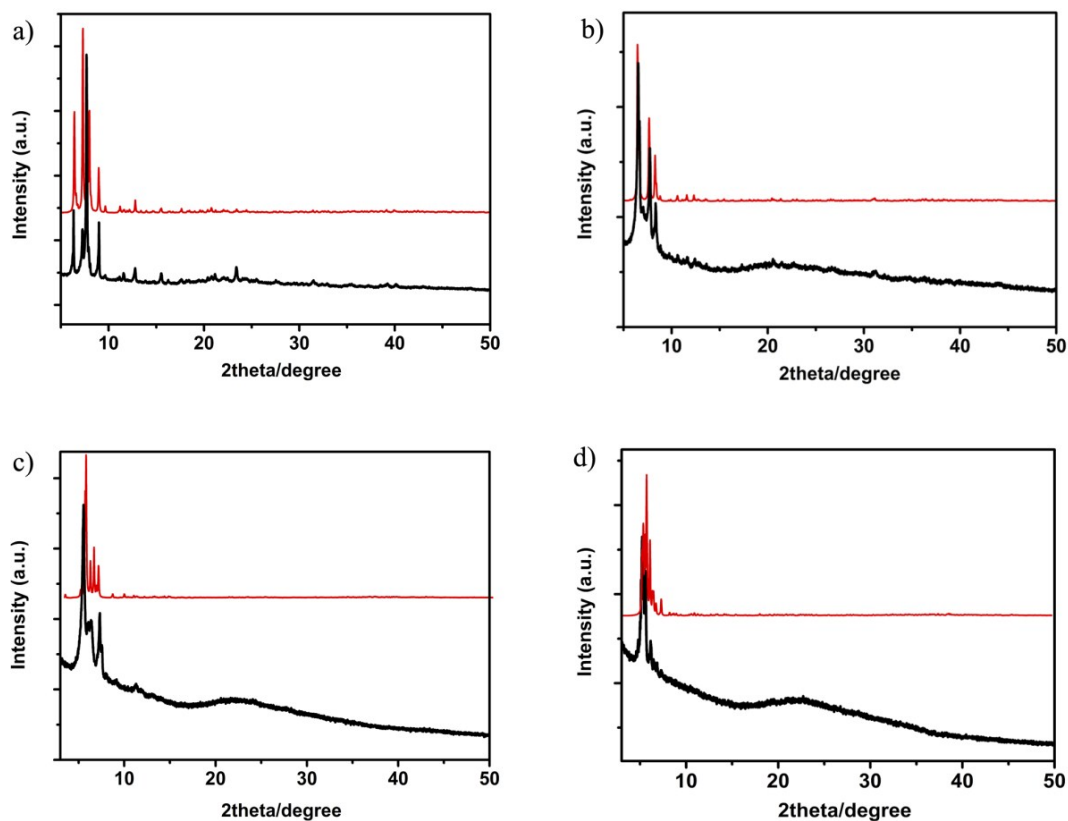

**Fig. S2** Simulated (red line) and experimental (black line) PXRD patterns of a) **1**, b) **2**, c) **3**, and d) **4**.

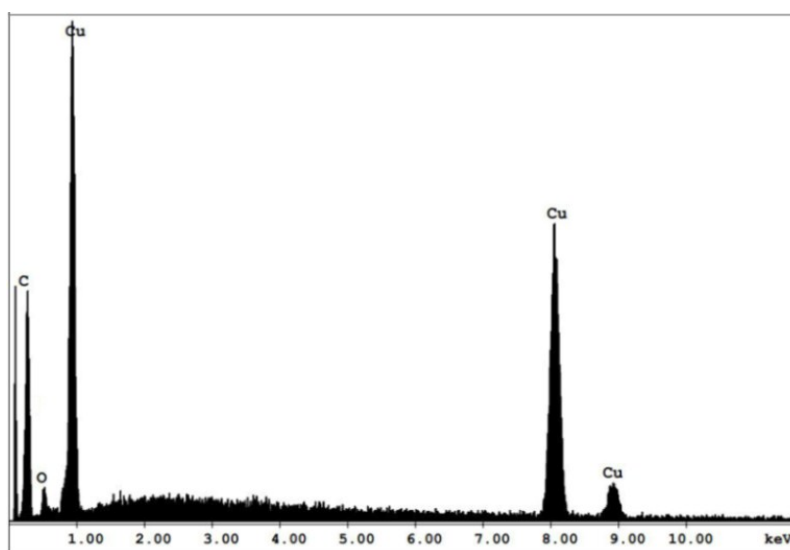

**Fig. S3** EDS spectrum of **1**. The signal of nitrogen is absent since its response is too weak to be detected for most common EDS detector designs.<sup>[2]</sup>

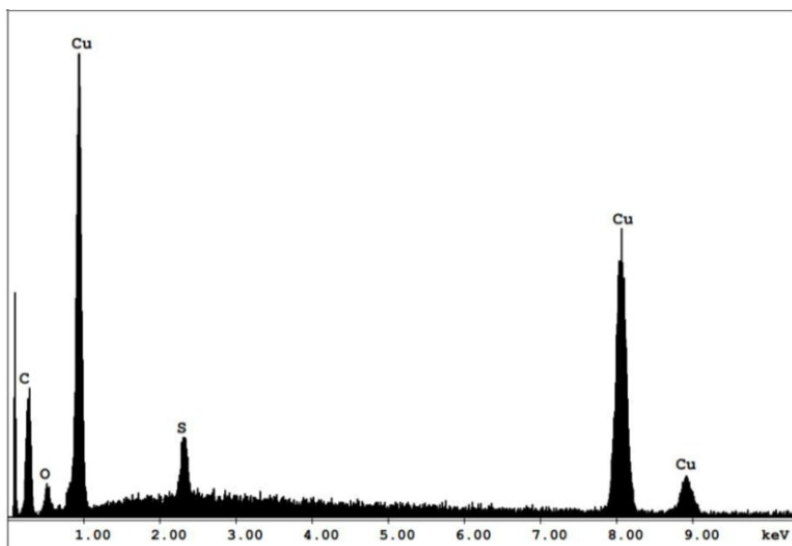

Fig. S4 EDS spectrum of **2**.

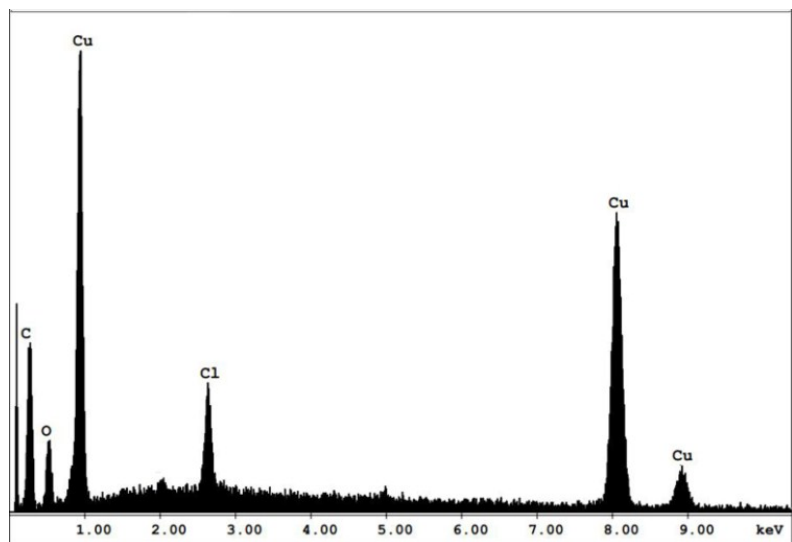

Fig. S5 EDS spectrum of **3**.

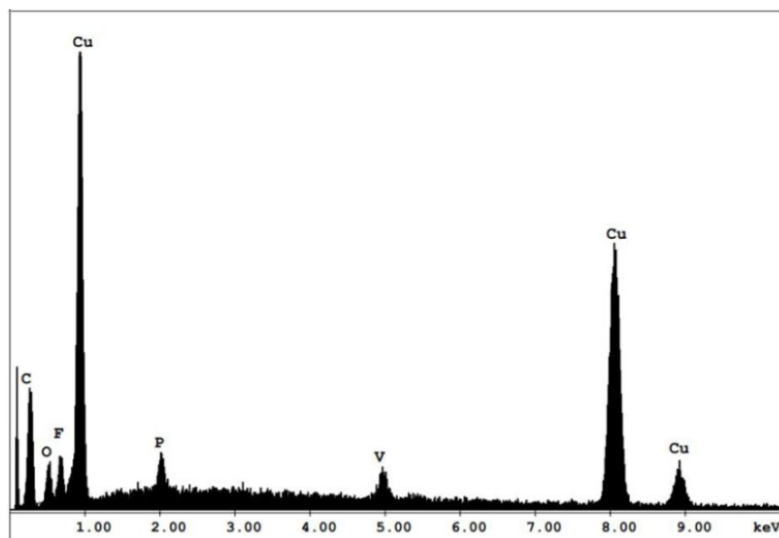

**Fig. S6** EDS spectrum of **4**.

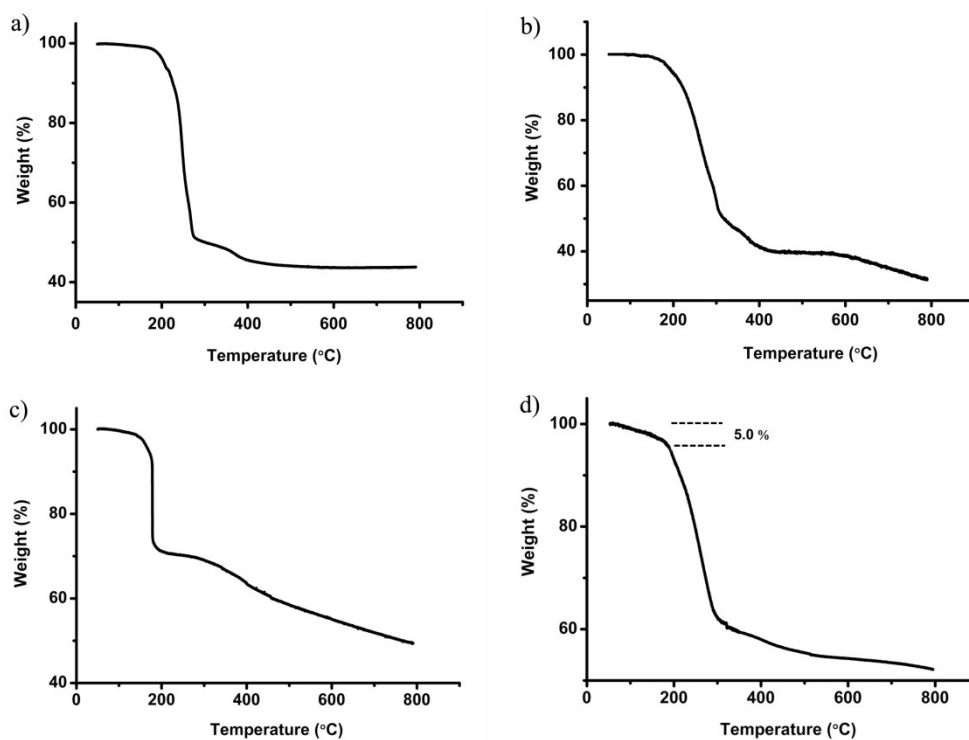

**Fig. S7** TGA curves of a) **1**, b) **2**, c) **3**, and d) **4**. In d), the weight loss of 5.0% corresponds to evacuation of the solvent molecules  $2\text{Et}_2\text{O} + 2\text{CH}_2\text{Cl}_2 + \text{H}_2\text{O}$  (calc. 5.28%) in **4**. TGA analysis confirmed that **1–4** are thermally stable to about 150 °C.



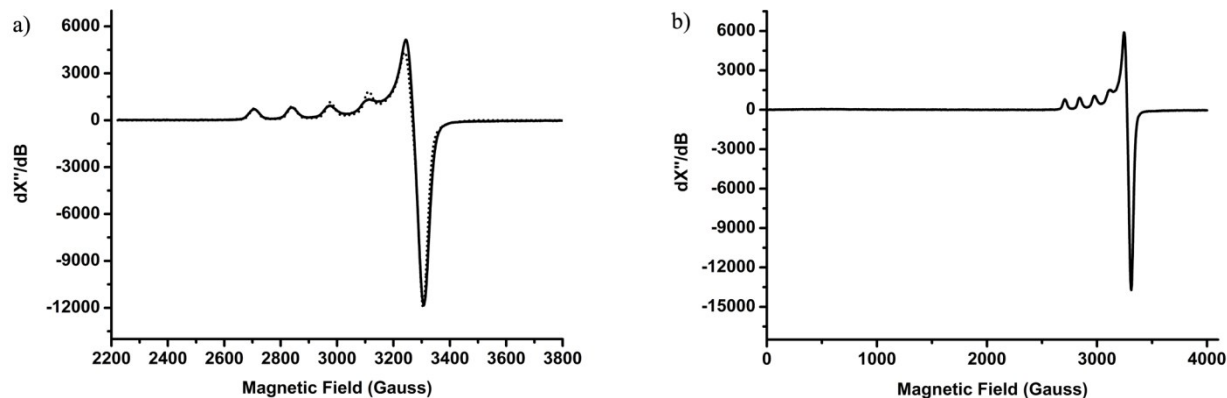

**Fig. S8** a) EPR spectrum of **3** recorded at  $T = 7$  K in the solid state. Spectral parameters:  $g_{\parallel} = 2.310$ ,  $g_{\perp} = 2.053$ ; hyperfine coupling to Cu(II) ( $I = 3/2$ ):  $A_{\parallel} = 135$  Gauss,  $A_{\perp} = 11.1$  Gauss. Solid line: experimental; dashed line: simulated. b) EPR spectrum in the range 0–4000 Gauss at  $T = 7$  K. No response in mid-field (1500–2000 Gauss) region signifies the absence of Cu(II)··Cu(II) interaction, and in the present case it indicates the presence of a single Cu(II) cation.

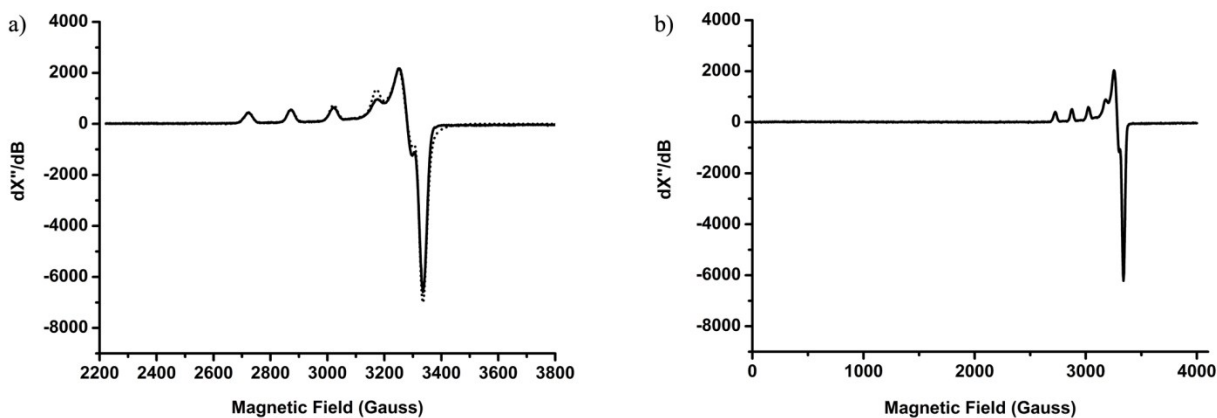

**Fig. S9** a) EPR spectrum of **4** recorded at  $T = 7$  K in the solid state. Spectral parameters:  $g_{\parallel} = 2.280$ ,  $g_{\perp} = 2.040$ ; hyperfine coupling to Cu(II) ( $I = 3/2$ ):  $A_{\parallel} = 150$  Gauss,  $A_{\perp} = 16.0$  Gauss. Solid line: experimental; dashed line: simulated. b) EPR spectrum recorded in the range 0–4000 Gauss at  $T = 7$  K. No response in mid-field (1500–2000 Gauss) region signifies the absence of Cu(II)··Cu(II) interaction, and in the present case it indicates the presence of a single Cu(II) cation.

### III. Dielectric and Conductivity Measurements:

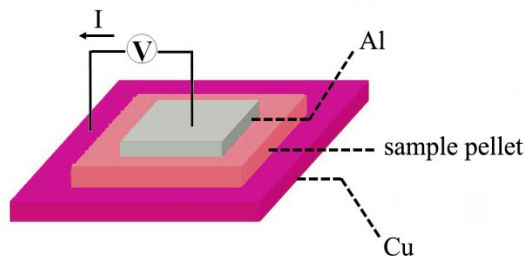

**Fig. S10** Electronic device used for dielectric and conductivity measurement.

To prepare the sample pellets of **1–4**, about 15 mg of bulk crystals were ground in an agate mortar. The finely ground powders were transferred to the central section of a Cu metal sheet with an area of  $1.0\text{ cm} \times 1.0\text{ cm}$ . Afterwards a tiny piece of weighing paper was used to cover the powders and then compressed by a pressing equipment (e.g. one used in IR measurement) at a pressure of 5 tons for a few seconds. Upon gentle removal of the weighing paper, a compact sample pellet was affixed on the Cu metal sheet. The thickness and area of the pellet were measured by a micrometer. Finally, this composite was coated with a thin Al metal layer via thermal evaporation method, where the pattern of the Al layer was controlled by a shadow mask with a feature size (ca.  $2.5\text{ mm} \times 2.5\text{ mm}$ ). Fig. S10 shows the final structure of the electronic device where the area of the component should follow the order: Al layer < sample pellet < Cu sheet. Dielectric measurement was conducted on an Agilent 4263B LCR Meter equipment. Temperature-dependent electrical conductivity was measured by recording current–voltage (I–V) curve using a Keithley sourcemeter 2612 equipment to scan the current on a voltage basis of  $-5$  to  $5\text{ V}$ . Temperature was control by Cryogenic Stage (Linkam T95-PE) and at every temperature step, a soak time of 2 minutes was generally required. The conductivity was extracted from linear regression results of the I–V curves. The activation energy was determined by fitting with the Arrhenius equation,  $\sigma = \sigma_0 e^{-E_a/(k \cdot T)}$ , where  $\sigma_0$  is the conductivity prefactor,  $E_a$  the activation energy,  $k$  the Boltzmann constant, and  $T$  the temperature. The experimental conductivity was recorded in the range  $293\text{--}373\text{ K}$  where above  $373\text{ K}$  the Al layer became crispy and started to crack.

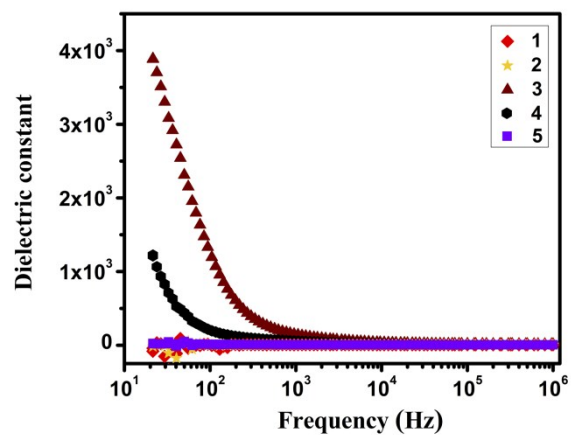

**Fig. S11** Frequency-dependent dielectric behavior of **1–5**. Herein, **5** represents the previously reported complex  $[\text{Cu(I)}_{17}(\text{tBuC}\equiv\text{C})_{16}\text{MeOH}] \cdot \text{BF}_4$  comprising the cationic cluster of  $[\text{Cu(I)}_{17}(\text{tBuC}\equiv\text{C})_{16}\text{MeOH}]^+$  and the  $\text{BF}_4^-$  counter anion.<sup>[3]</sup>

#### IV. Crystal Structures

**Single-Crystal X-ray Diffraction:** Crystallographic data of **1–4** were collected at a temperature of 173 K on a single crystal diffractometer using graphite-monochromatic Mo K $\alpha$  radiation ( $\lambda = 0.71073$  Å). All structures were solved by direct methods and refined with the full-matrix least-squares technique based on  $F^2$  using SHELXTL.<sup>[4]</sup> All non-hydrogen atoms were refined anisotropically, and hydrogen atoms bonded to carbon were generated geometrically. Compound **3** has a solvent accessible area of 13.3% per unit-cell ( $5499.0/41500.0$  Å<sup>3</sup>), in which the solvent molecules (CH<sub>2</sub>Cl<sub>2</sub> and Et<sub>2</sub>O) are highly disordered to be unambiguously modeled. *SQUEEZE* program implemented in *PLATON* was applied to remove solvent electron density (*SQUEEZE* result has been appended to cif file).<sup>[5]</sup> Furthermore, these solvent molecules evacuate from the crystal lattice at room temperature, which gave unsatisfactory TGA and EA results. Therefore, TGA and EA measurements of **3** were performed on crystal samples after removing the solvent molecules under vacuum by stirring.

For compound [V<sub>10</sub>O<sub>28</sub>]<sub>2</sub>·[H<sub>3</sub>O]<sub>12</sub>, hydrogen atoms riding on oxygen were all found on the difference Fourier map, brought to reasonable distances from their parent oxygen atoms, and then fixed. Crystallographic data for [V<sub>10</sub>O<sub>28</sub>]<sub>2</sub>·[H<sub>3</sub>O]<sub>12</sub>: triclinic, space group  $P\bar{1}$ ,  $a = 10.1593(8)$  Å,  $b = 10.2950(9)$  Å,  $c = 16.7352(13)$  Å,  $\alpha = 83.426(2)^\circ$ ,  $\beta = 87.127(2)^\circ$ ,  $\gamma = 71.045(2)^\circ$ ,  $V = 1644.4(2)$  Å<sup>3</sup>,  $T = 296$  K,  $Z = 2$ ,  $R_1 = 0.0346$  for reflections with  $I > 2\sigma(I)$ ,  $wR_2 = 0.1049$  for all data, number of reflections/unique reflections = 52059/7911, GOF = 1.207, CCDC no. 1907669. Crystallographic data for [Cu(II)(PrPO<sub>3</sub>)(H<sub>2</sub>O)]<sub>n</sub>: monoclinic, space group  $P2_1/c$ ,  $a = 11.9726(15)$  Å,  $b = 7.5977(10)$  Å,  $c = 7.4217(9)$  Å,  $\alpha = 90^\circ$ ,  $\beta = 97.625(4)^\circ$ ,  $\gamma = 90^\circ$ ,  $V = 669.14(15)$  Å<sup>3</sup>,  $T = 296$  K,  $Z = 4$ ,  $R_1 = 0.1177$  for reflections with  $I > 2\sigma(I)$ ,  $wR_2 = 0.3087$  for all data, number of reflections/unique reflections = 12755/1464, GOF = 1.210, CCDC no. 1907707.

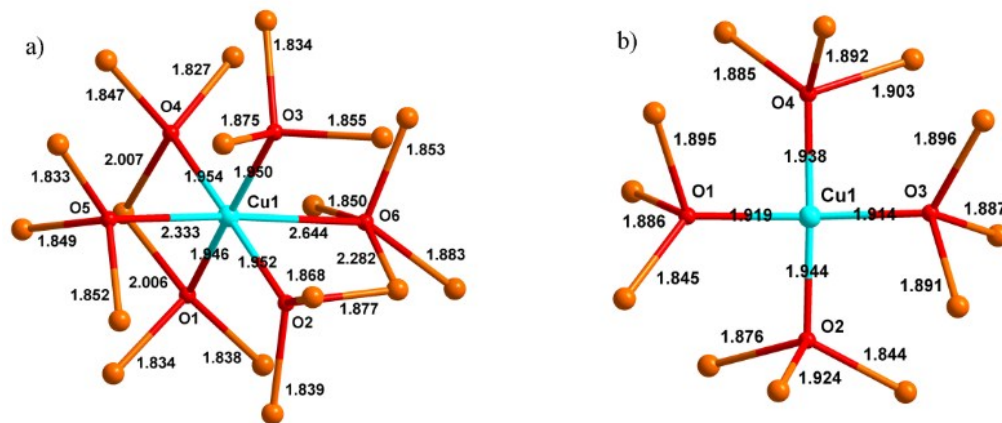

**Fig. S12** Cu(I)-O-Cu(II) bonding interactions in a) **3** and b) **4** with the bond distances shown. In **3**, Cu1 exhibits an octahedral coordination environment with significant Jahn-Teller distortion, whereas in **4** Cu1 displays a distorted square-planar coordination geometry.

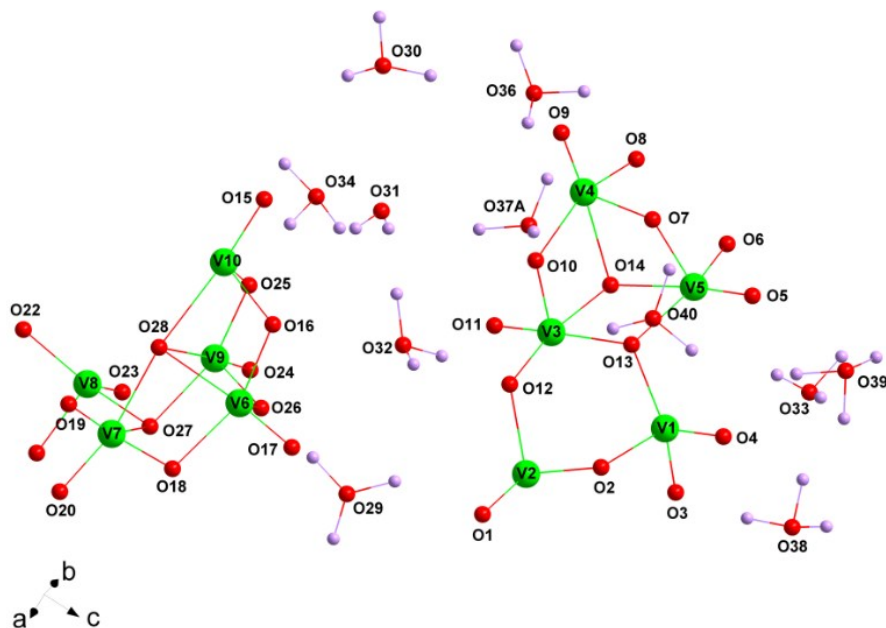

**Fig. S13** Asymmetric unit of  $[V_{10}O_{28}]_2 \cdot [H_3O]_{12}$  with atom labels shown. Color code: V-green, O-red, and H-rose.

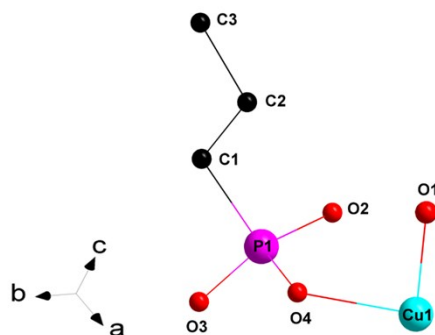

**Fig. S14** Asymmetric unit of  $[\text{Cu(II)(PrPO}_3\text{)(H}_2\text{O)}]_n$  with atom labels shown.

**Table S1.** Crystallographic data of **1–4**.

| Compound                                 | <b>1</b>                                               | <b>2</b>                                                            | <b>3</b>                                                             | <b>4</b>                                                                                                        |
|------------------------------------------|--------------------------------------------------------|---------------------------------------------------------------------|----------------------------------------------------------------------|-----------------------------------------------------------------------------------------------------------------|
| CCDC no.                                 | 1907665                                                | 1907666                                                             | 1907667                                                              | 1907668                                                                                                         |
| Formula                                  | $\text{C}_{84}\text{H}_{126}\text{Cu}_{15}\text{NO}_3$ | $\text{C}_{134}\text{H}_{204}\text{Cu}_{28}\text{O}_{10}\text{S}_2$ | $\text{C}_{165}\text{H}_{231}\text{Cl}_4\text{Cu}_{48}\text{O}_{22}$ | $\text{C}_{180}\text{H}_{289}\text{B}_3\text{Cl}_4\text{Cu}_{47}\text{F}_{12}\text{O}_{22}\text{P}_2\text{V}_2$ |
| $M_r$                                    | 3818.47                                                | 3818.47                                                             | 5758.60                                                              | 6357.92                                                                                                         |
| Crystal system                           | monoclinic                                             | monoclinic                                                          | monoclinic                                                           | triclinic                                                                                                       |
| Space group                              | $C2/c$                                                 | $P2_1/c$                                                            | $C2/c$                                                               | $P\bar{1}$                                                                                                      |
| $a$ (Å)                                  | 49.115(10)                                             | 18.680(2)                                                           | 56.4611(18)                                                          | 19.9192(17)                                                                                                     |
| $b$ (Å)                                  | 15.305(3)                                              | 14.6314(17)                                                         | 19.3733(7)                                                           | 20.0207(17)                                                                                                     |
| $c$ (Å)                                  | 28.157(5)                                              | 31.316(4)                                                           | 38.1762(13)                                                          | 32.564(3)                                                                                                       |
| $\alpha$ (°)                             | 90                                                     | 90                                                                  | 90                                                                   | 90.482(2)                                                                                                       |
| $\beta$ (°)                              | 112.054(10)                                            | 104.937(3)                                                          | 96.377(2)                                                            | 101.813(2)                                                                                                      |
| $\gamma$ (°)                             | 90                                                     | 90                                                                  | 90                                                                   | 116.372(2)                                                                                                      |
| $V$ (Å <sup>3</sup> )                    | 19617(7)                                               | 8269.9(17)                                                          | 41500(2)                                                             | 11315.2(17)                                                                                                     |
| $T$ (K)                                  | 173                                                    | 173                                                                 | 173                                                                  | 173                                                                                                             |
| $Z$                                      | 8                                                      | 2                                                                   | 8                                                                    | 2                                                                                                               |
| $D_{\text{calcd}}$ (g cm <sup>-3</sup> ) | 1.420                                                  | 1.490                                                               | 1.833                                                                | 1.855                                                                                                           |
| $\mu$ (mm <sup>-1</sup> )                | 3.215                                                  | 3.580                                                               | 4.898                                                                | 4.507                                                                                                           |
| $F(000)$                                 | 8336.0                                                 | 3648.0                                                              | 22656.0                                                              | 6278.5                                                                                                          |
| Reflns                                   | 67408                                                  | 182816                                                              | 191889                                                               | 162295                                                                                                          |
| Unique reflns                            | 21404                                                  | 20477                                                               | 38009                                                                | 39875                                                                                                           |
| GOF                                      | 1.000                                                  | 1.037                                                               | 1.074                                                                | 1.115                                                                                                           |
| $R_{\text{int}}$                         | 0.1321                                                 | 0.1144                                                              | 0.0750                                                               | 0.0436                                                                                                          |
| $R_1 [I > 2\sigma(I)]^a$                 | 0.0801                                                 | 0.0761                                                              | 0.0610                                                               | 0.0681                                                                                                          |
| $wR_2$ (all data) <sup>b</sup>           | 0.2704                                                 | 0.2144                                                              | 0.1936                                                               | 0.1920                                                                                                          |

<sup>a</sup> $R_1 = \sum ||F_o| - |F_c|| / \sum |F_o|$ ; <sup>b</sup> $wR_2 = \{ \sum [w(F_o^2 - F_c^2)^2] / \sum w(F_o^2)^2 \}^{1/2}$ .

**Table S2.** Bond-valence sum (BVS)<sup>[6]</sup> calculations for **3** and **4**.

| <b>3</b> |            |                  | <b>4</b> |            |                  |
|----------|------------|------------------|----------|------------|------------------|
| bond     | length (Å) | BVS              | bond     | length (Å) | BVS              |
| Cu1–O1   | 1.957      | 0.471729         | Cu1–O1   | 1.918      | 0.524166         |
| Cu1–O2   | 1.940      | 0.493908         | Cu1–O2   | 1.945      | 0.487279         |
| Cu1–O3   | 1.947      | 0.484652         | Cu1–O3   | 1.913      | 0.531298         |
| Cu1–O4   | 1.950      | 0.480738         | Cu1–O4   | 1.940      | 0.493908         |
| Cu1–O5   | 2.325      | 0.174574         |          |            | sum: <b>2.04</b> |
| Cu1–O6   | 2.635      | 0.075549         | V1–O5    | 1.730      | 1.218106         |
|          |            | sum: <b>2.18</b> | V1–O6    | 1.771      | 1.090337         |
|          |            |                  | V1–O7    | 1.717      | 1.261665         |
|          |            |                  | V1–O8    | 1.719      | 1.254864         |
|          |            |                  |          |            | sum: <b>4.80</b> |
|          |            |                  | V2–O9    | 1.723      | 1.241371         |
|          |            |                  | V2–O10   | 1.698      | 1.328146         |
|          |            |                  | V2–O11   | 1.766      | 1.105171         |
|          |            |                  | V2–O12   | 1.712      | 1.27883          |
|          |            |                  |          |            | sum: <b>4.95</b> |

## V. References

- [1] S. Chausson, J.-M. Rueff, M. B. Lepetit, O. Perez, R. Retoux, C. Simon, L. L. Pluart, P.-A. Jaffrès, *Eur. J. Inorg. Chem.* **2012**, 2193.
- [2] J. Berlin, T. Salge, M. Falke, D. Goran, Recent Advances in EDS and EBSD Technology: Revolutionizing the Chemical Analysis of Chondritic Meteorites at the Micro- and Nanometer Scale, 42nd Lunar and Planetary Science Conference, 2723, (2011).
- [3] L.-M. Zhang, T. C. W. Mak, *J. Am. Chem. Soc.* **2016**, 138, 2909.
- [4] C. B. Hübschle, G. M. Sheldrick, B. Dittrich, *J. Appl. Cryst.* **2011**, 44, 1281.
- [5] A. L. Spek, *J. Appl. Crystallogr.* **2003**, 36, 7.
- [6] I. D. Brown, D. Altermatt, *Acta Crystallogr.* **1985**, B41, 244.
